# Supplementary material
Source: PubMed Central journal article supplement (PMC5903578)
Supplement: NIHMS876710-supplement-Yang_NatMeth_Supp.pdf [file NIHMS876710-supplement-Yang_NatMeth_Supp.pdf]

**Supplementary Table 1 | Summary of application-oriented imaging modalities and techniques.**

| Technology                                                                                                             | Basic Mechanism                                                                                                                                                          | Advantages                                                                                                                                                    | Limitations                                                                                                            | Exemplary Applications                                                                                                                                                                                 | Ref.         |
|------------------------------------------------------------------------------------------------------------------------|--------------------------------------------------------------------------------------------------------------------------------------------------------------------------|---------------------------------------------------------------------------------------------------------------------------------------------------------------|------------------------------------------------------------------------------------------------------------------------|--------------------------------------------------------------------------------------------------------------------------------------------------------------------------------------------------------|--------------|
| <b>A. Transparent preparations (Hydra, worm, zebra-fish, Drosophila larva, superficial layers of cortex, etc.)</b>     |                                                                                                                                                                          |                                                                                                                                                               |                                                                                                                        |                                                                                                                                                                                                        |              |
| <b>AI. Wide field imaging (Fluorescence imaged with camera: CCD or scientific CMOS camera)</b>                         |                                                                                                                                                                          |                                                                                                                                                               |                                                                                                                        |                                                                                                                                                                                                        |              |
| Standard epi-fluorescence                                                                                              | One-photon, wide-area excitation on sample.                                                                                                                              | Most basic fluorescence microscope; Large FOV; Commercially mature.                                                                                           | No optical sectioning; Out-of-focus regions fluorescing and contributing to background.                                | Immunohistochemistry in brain slides; <i>In vivo</i> fluorescence inspection; <i>In vivo</i> mesoscale (low spatial resolution) intrinsic / calcium / voltage imaging.                                 | 11-14        |
| Spinning disk confocal<br>[closely related to confocal laser scanning microscopy (CLSM)]                               | Multiple one-photon excitation focal spots scanned across sample in 2D; Out-of-focus fluorescence rejected by pinholes upon detection.                                   | Optical sectioning; Commercially mature.                                                                                                                      | Out-of-focus regions fluorescing and suppressed at detection, wasting excitation energy in those regions.              | Immunohistochemistry in brain slides; <i>In vivo</i> fluorescence inspection; Functional imaging in samples not sensitive photodamage.                                                                 | 15, 17       |
| Light-sheet                                                                                                            | A thin one/two-photon light-sheet excitation, injected to the sample in an orthogonal direction to the detection.                                                        | Optical sectioning; Efficient usage of excitation photons; Large FOV; Commercially available.                                                                 | Sophisticated alignment; Extra objectives required.                                                                    | Functional circuit mapping across extended brain volume.                                                                                                                                               | 3, 19-23     |
| Temporal focusing (TF)                                                                                                 | A two-photon excitation plane on sample, with its tight axial confinement enabled by geometric dispersion at out-of-focus regions.                                       | Wide-field scanless two-photon; Tight optical sectioning over large FOV; Spatially patterned illumination when combined with a spatial light modulator (SLM). | High laser peak power required for excitation of the entire plane.                                                     | Retinal neural activity; Synapse dynamics in superficial cortical layers.                                                                                                                              | 28, 29       |
| Extended depth of field (EOF) holographic                                                                              | Holographic patterned multiple two-photon excitation focal spots imaging targeted cells in 3D; Fluorescence detected by a wavefront-coded camera across extended depths. | Simultaneously imaging multi-sites in 3D.                                                                                                                     | Number of simultaneous imaging spots limited by laser power and camera dynamic range.                                  | Synapse activity across dendritic arbor in superficial cortical layers.                                                                                                                                | 34, 35       |
| Light-field (LF)                                                                                                       | One-photon, whole volume excitation on sample; Camera with microlens array to collect spatial and angular information of emitted fluorescence.                           | Simultaneously imaging whole volume in 3D.                                                                                                                    | Complicated image deconvolution and optimization; Tradeoff between lateral / axial resolution and axial imaging range. | The sophisticated data reconstruction procedure may need to be further optimized for practical applications.                                                                                           | 37           |
| <b>B. Scattering preparations (cortex or deep brain regions in rodents, cats, songbirds, non-human primates, etc.)</b> |                                                                                                                                                                          |                                                                                                                                                               |                                                                                                                        |                                                                                                                                                                                                        |              |
| <b>BI. Two-photon laser scanning microscopy (Fluorescence detected with PMT)</b>                                       |                                                                                                                                                                          |                                                                                                                                                               |                                                                                                                        |                                                                                                                                                                                                        |              |
| Standard two-photon laser scanning microscopy (2PLSM)                                                                  | A single two-photon focal spot raster scanned across sample. Non-descanned detection with a PMT.                                                                         | Resistant to scattering; Deep layer imaging; Reduced phototoxicity (compared to confocal microscopy). Commercially mature.                                    | Expensive two-photon lasers; Limited pixel rates.                                                                      | Functional connectivity between cortical layers; Excitatory and inhibitory circuits; Cortical response to sensory stimulus; Neural activity during behavior; Neurovascular coupling; Spines formation. | 4, 5, 38, 39 |
| Fast 3D imaging                                                                                                        | Piezo-controlled objective                                                                                                                                               | Axial position of objective controlled by piezo.                                                                                                              | Easy setup and readily attached to two-photon laser scanning microscopes.                                              | Mechanical movement introduced; Relatively slow speed.                                                                                                                                                 | 41           |

|                                                                               |                                                                                 |                                                                                                                                                        |                                                                                     |                                                                                                                                                 |                                                                                                                                         |                                                                                                                                             |
|-------------------------------------------------------------------------------|---------------------------------------------------------------------------------|--------------------------------------------------------------------------------------------------------------------------------------------------------|-------------------------------------------------------------------------------------|-------------------------------------------------------------------------------------------------------------------------------------------------|-----------------------------------------------------------------------------------------------------------------------------------------|---------------------------------------------------------------------------------------------------------------------------------------------|
|                                                                               | Electrically tunable lens (ETL)                                                 | Liquid lens shape changed to perform refocusing.                                                                                                       | Low cost.                                                                           | Relatively slow speed.                                                                                                                          |                                                                                                                                         | 42                                                                                                                                          |
|                                                                               | Spatial light modulator (SLM)                                                   | Programmable SLM to change the light wavefront (beam divergence) to perform refocusing.                                                                | High speed; Capable for wavefront correction and beam multiplexing.                 |                                                                                                                                                 | High speed volumetric imaging; Neural circuits dynamics across multiple cortical layers.                                                | 44                                                                                                                                          |
|                                                                               | Ultrasound lens (UL) / Tunable acoustic gradient index of refraction (TAG) lens | Standing acoustic wave across the lens to spatially modulate its refractive index to perform refocusing.                                               | Extremely high speed in axial scan.                                                 | Must continuously scan in axial direction.                                                                                                      |                                                                                                                                         | 45                                                                                                                                          |
|                                                                               | Remote focusing                                                                 | An auxiliary objective and a scanning mirror combined as a retroreflective unit to change the light wavefront (beam divergence) to perform refocusing. | Minimized optical distortion.                                                       | Sophisticated alignment; An extra objective and custom-designed parts required; Scanning mirror should sustain focused high power laser pulses. |                                                                                                                                         | 47, 48                                                                                                                                      |
|                                                                               | Acousto-optic deflectors (AOD) for random access                                | Traveling acoustic wave across the glass to modulate its refractive index to create periodic/chirped diffractive grating to deflect/refocus light.     | Extremely high speed beam hopping.                                                  | High insertion loss and expensive; Non-trivial realignment if excitation wavelength changed.                                                    |                                                                                                                                         | 50, 51, 53                                                                                                                                  |
|                                                                               | Large FOV                                                                       | Special designed optics; Large aperture objectives with low magnification and high NA.                                                                 | Extremely large field of view.                                                      | Customer-designed aberration correction optics and objective required.                                                                          |                                                                                                                                         | Detailed circuitry across different cortical regions; Multiple orientation columns in primary visual cortex of cats and non-human primates. |
| <b>B2. Multiplexing technology in two-photon microscopy (high throughput)</b> |                                                                                 |                                                                                                                                                        |                                                                                     |                                                                                                                                                 |                                                                                                                                         |                                                                                                                                             |
|                                                                               | Temporal multiplexing                                                           | Laser pulses interleaved in time and scanned across different regions in sample.                                                                       | Fast imaging multi-region/multiplane in 3D.                                         | Sophisticated optical alignment, setup and data acquisition hardware.                                                                           | Information flow between different cortical regions                                                                                     | 58                                                                                                                                          |
|                                                                               | Multifocal microscopy with multianode PMT                                       | Multiple beams scanned different regions in a 2D grid. Fluorescence from each excitation beam detected by one anode in multianode PMT.                 | Fast imaging multi-region in 2D.                                                    | Cross-talk when imaging deep layers due to tissue scattering.                                                                                   | Combined with large FOV microscope for fast mesoscale imaging with cellular resolution.                                                 | 59                                                                                                                                          |
|                                                                               | Wavelength multiplexing                                                         | Multiple laser beams with different wavelengths to excite different fluorophores in sample.                                                            | Image different cell types simultaneously.                                          | Optical parametric oscillators (OPOs) or extra two-photon lasers required.                                                                      | Activity of different cell types (e.g. pyramidal cells / interneurons / astrocytes).                                                    | 62                                                                                                                                          |
|                                                                               | Code multiplexing                                                               | Holographic patterned multiple beams imaging targeted cells. Each beam tagged with different temporal features, used to unmix the PMT detected signal. | Simultaneously imaging multi-site in 3D; No scanning required.                      | Tradeoff between total number of simultaneously imaging spots and temporal resolution.                                                          | Synapse dynamics in deep cortical layers.                                                                                               | 64                                                                                                                                          |
|                                                                               | Holographic multiplane                                                          | Holographic patterned multiple beams scanned across different planes in sample. Source separation algorithm to unmix the PMT detected signal.          | Fast imaging multi-region/multiplane in 3D; High flexibility; Simple optical setup. | Total number of simultaneous imaged regions/planes limited by labelling sparsity.                                                               | Activity correlations between different cortical layers; Relations between upstream interneurons and downstream activity and synchrony. | 44                                                                                                                                          |

|                                           |                                      |                                                                                                                                                       |                                                                                                                                                                                        |                                                                                                                                            |                                                                                                                                                                  |                                                                                                                                                      |        |
|-------------------------------------------|--------------------------------------|-------------------------------------------------------------------------------------------------------------------------------------------------------|----------------------------------------------------------------------------------------------------------------------------------------------------------------------------------------|--------------------------------------------------------------------------------------------------------------------------------------------|------------------------------------------------------------------------------------------------------------------------------------------------------------------|------------------------------------------------------------------------------------------------------------------------------------------------------|--------|
|                                           | Engineered PSF                       | PSF (Wavefront) engineered excitation beam (e.g. laterally- or axially-extended) scanned across sample. Signal recovered with statistical algorithms. | Fast imaging speed.                                                                                                                                                                    | High laser peak power may be required for the desired beam profile. Sample may be required to be sparsely labeled.                         | Combined with large FOV microscopes for fast mesoscale imaging with cellular resolution.                                                                         | 66, 69, 70                                                                                                                                           |        |
| <b>B3. Deep brain imaging</b>             |                                      |                                                                                                                                                       |                                                                                                                                                                                        |                                                                                                                                            |                                                                                                                                                                  |                                                                                                                                                      |        |
|                                           | Adaptive optics (AO)                 | SLM or deformable mirror (DM) to shape the light wavefront to counteract the light scattering effect in sample.                                       | Access to deep layers with high quality optical signal.                                                                                                                                | Limited correction field of view.                                                                                                          | Dynamics of fine structures (e.g. spines, boutons) in deep brain regions                                                                                         | 76-79, 81, 82                                                                                                                                        |        |
|                                           | Three-photon                         | Longer wavelength light encounters less light scattering.                                                                                             | Resistant to light scattering; Access to deep layers.                                                                                                                                  | Low three-photon absorption coefficient resulting in a requirement of higher laser power or lower frame rate; Three-photon laser required. | Deep layers (e.g. cortical layer 5, 6 and hippocampus) imaging for an intact brain.                                                                              | 72, 83                                                                                                                                               |        |
|                                           | Gradient-index (GRIN) lens assisted  | The GRIN lens serving as a relay lens and objective to deliver and focus light deep into the brain.                                                   | Access to deep layers.                                                                                                                                                                 | Highly invasive to the brain.                                                                                                              | Functional imaging of hippocampus, thalamus and hypothalamus; Dendritic spines in CA1.                                                                           | 84, 87                                                                                                                                               |        |
|                                           | Micro-prism assisted                 | Micro-prism inserted in the brain converting axial planes into horizontal planes for imaging.                                                         | Simultaneous imaging across all cortical layers in a single FOV.                                                                                                                       | Highly invasive to the brain.                                                                                                              | Inter- and intralaminar cortical dynamics and information flow; Neural activity in medial prefrontal cortex, or similar regions buried inside the cortical sulci | 85, 86                                                                                                                                               |        |
|                                           | Specially designed collection optics | Specially designed optics to collect the fluorescence that escapes from the collection cone of objective.                                             | Enhance the signal to noise ratio.                                                                                                                                                     | Specially designed collection optics.                                                                                                      | Deep layers imaging for an intact brain.                                                                                                                         | 73                                                                                                                                                   |        |
| <b>C. Imaging freely behaving animals</b> |                                      |                                                                                                                                                       |                                                                                                                                                                                        |                                                                                                                                            |                                                                                                                                                                  |                                                                                                                                                      |        |
|                                           | Wide-field epi-fluorescence          | Integrated micro-scope                                                                                                                                | Integrated one-photon excitation light source, optics, camera into a miniaturized device.                                                                                              | Highly integrated, all-in-one system; Commercially available.                                                                              | Large footprint device mounted on mouse head.                                                                                                                    | Brain (e.g. cortex, hippocampus) activity during sensory, cognitive and motor tasks.                                                                 | 88, 89 |
|                                           |                                      | Fiber-scope (fiber-bundle / multicore fiber)                                                                                                          | Fiber bundle/ multicore fiber used to couple light between a one-photon bulk microscope and a miniaturized objective on the brain.                                                     | Capable to project patterns and advanced imaging schemes such as structured illumination.                                                  | Bulky bench-top optics required at proximal end; Reduced resolution due to pixilation of image.                                                                  | Influence of interneurons to the local neural network during animal behaviors; Simultaneous imaging and photostimulation in freely behaving animals. | 90, 91 |
|                                           | Two-photon scanning                  | Miniature micro-scope                                                                                                                                 | Integrated optics, scan engines (and PMT) into a miniaturized device, with two-photon excitation (and fluorescence) transmitted by special fibers such a photonic-crystal fiber (PCF). | Optical sectioning capability; Minimal pulse dispersion and self-phase modulation.                                                         | Large footprint device mounted on mouse head.                                                                                                                    | Technologies need to be further developed for practical applications.                                                                                | 92-95  |
|                                           |                                      | Fiber-bundle / multicore fiber                                                                                                                        | Fiber bundle/ multicore fiber used to couple light between a two-photon bulk microscope and a miniaturized objective on the brain.                                                     | Optical sectioning capability; Laser scanning at proximal end; Mechanical flexibility.                                                     | Reduced resolution due to pixilation of image; Dispersion compensation required; Self-phase modulation at high pulse energies.                                   |                                                                                                                                                      | 96     |
